# Supplementary material for: Leukotriene B4 amplifies NF-κB activation in mouse macrophages by reducing SOCS1 inhibition of MyD88 expression
Source: JCI journal article supplement (doi:10.1172/jci43302), 2011-01-04
Supplement: sd1 [file 1]

**Leukotriene B<sub>4</sub>-induced reduction of SOCS1 is required for murine macrophage MyD88 expression and NFκB activation**

Carlos H. Serezani<sup>1,3</sup>, Casey Lewis<sup>1</sup>, Sonia Jancar<sup>2</sup> and Marc Peters-Golden<sup>1,3</sup>

<sup>1</sup>Division of Pulmonary and Critical Care Medicine, Department of Internal Medicine, University of Michigan Health System, Ann Arbor, MI 48109 USA. <sup>2</sup>Department of Immunology, Institute of Biomedical Science IV, University of São Paulo, São Paulo, Brazil

<sup>3</sup>Address correspondence to: Marc Peters-Golden, M.D., 6301 MSRB III, 1150 W. Medical Center Drive, University of Michigan Health System, Ann Arbor, MI 48109-5642. E-mail: [petersm@umich.edu](mailto:petersm@umich.edu); Phone: 734-763-9077; Fax: 734-764-4556. Or to,

Carlos H. Serezani, Ph. D., 5501B MSRB I 1150 W. Medical Center Drive, University of Michigan Health System, Ann Arbor, MI 48109-5642. E-mail: [cserezan@med.umich.edu](mailto:cserezan@med.umich.edu); Phone: 734-615-5523; Fax: 734-764-4556.

**Conflict of interest:** Research support exceeding \$50,000 was provided by Nycomed to MP-G in the year prior to submission of this manuscript.

**Running title:** LTB<sub>4</sub> increases MyD88 expression and NFκB activation

Supplemental Figure 1

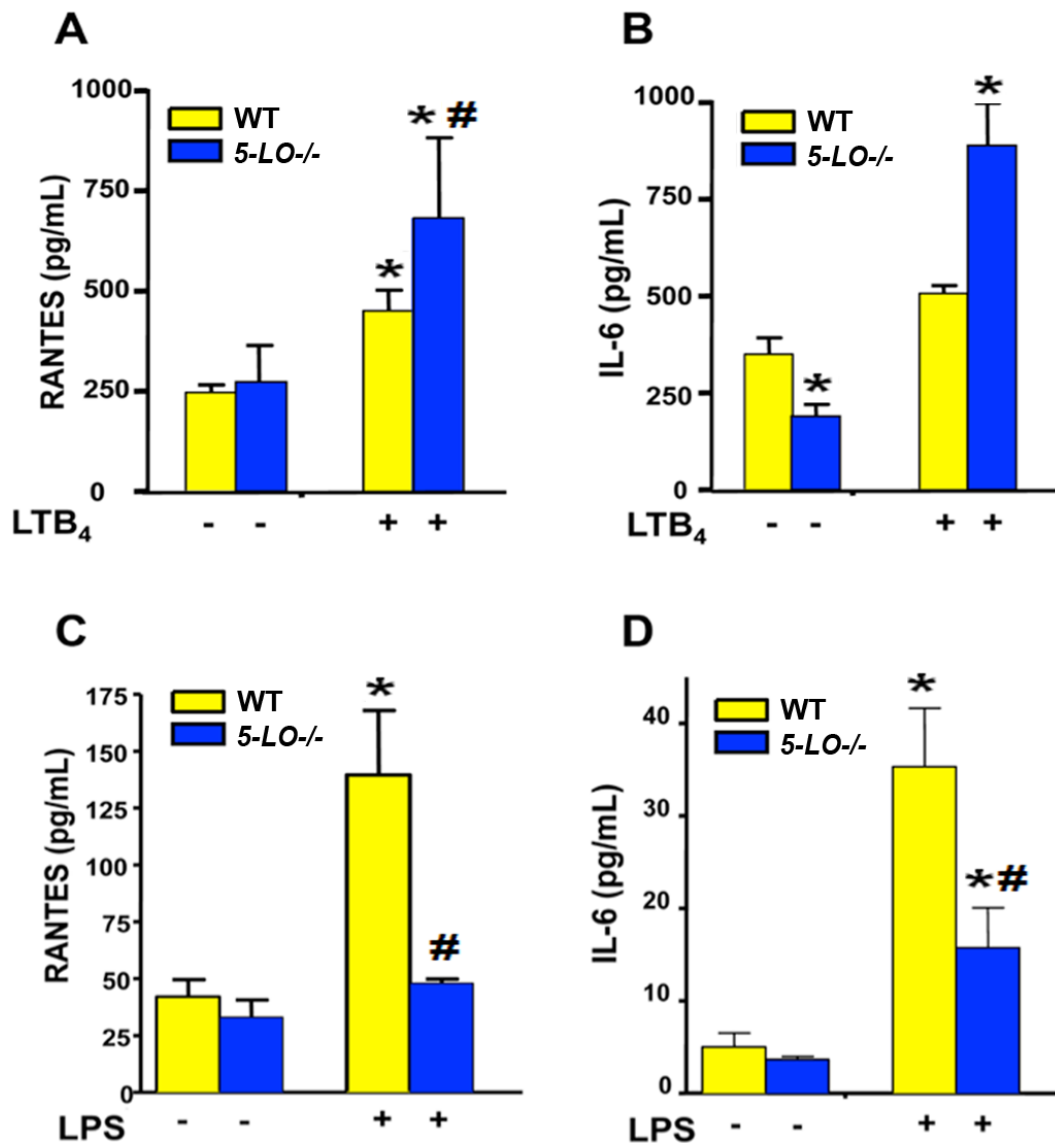

**Supplemental Figure 1. LTB<sub>4</sub> amplifies production of NFκB-regulated gene products in vitro and in vivo.** (A, B) WT and 5-LO<sup>-/-</sup> MΦs were treated for 24 h with or without LTB<sub>4</sub> and RANTES (A) and IL-6 (B) levels were determined by ELISA. (C, D) WT and 5-LO<sup>-/-</sup> mice were challenged i.p. with LPS and peritoneal lavage fluid was harvested 6 h thereafter for determination of RANTES (C) and IL-6 (D) levels by ELISA. Values represent the mean ± SEM from 3 individual experiments, each performed in triplicate. \**p* < 0.05 versus control WT; #*p* < 0.05 versus LPS- or LTB<sub>4</sub>-challenged cells.

Supplemental Figure 2

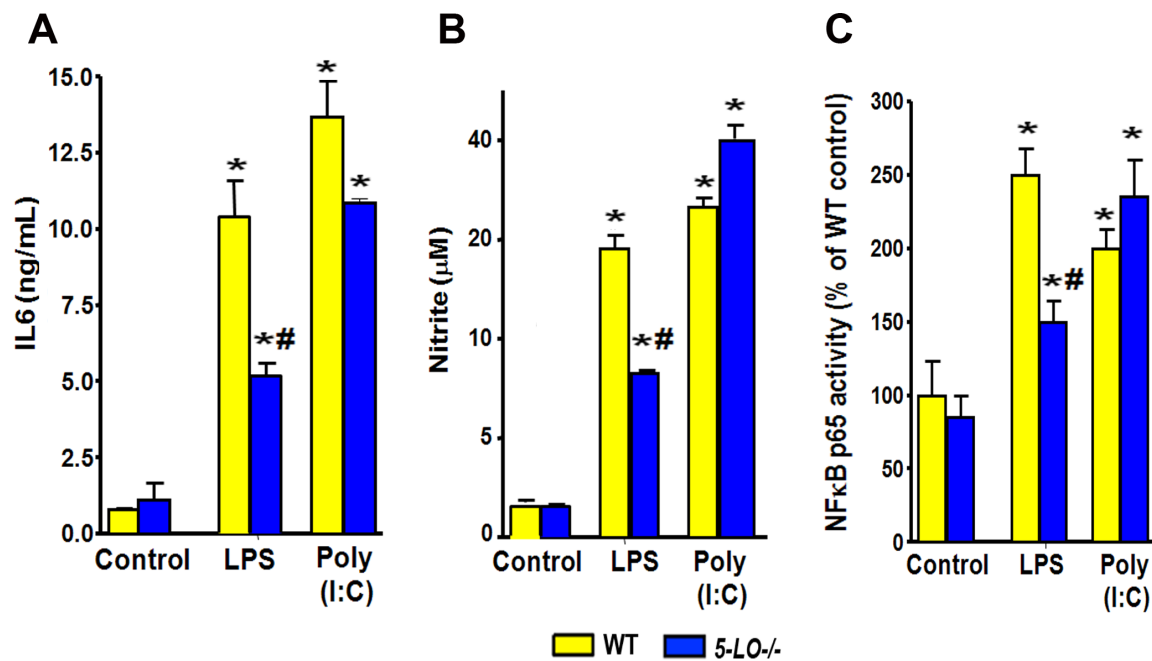

**Supplemental Figure 2. 5-LO products are required for MyD88-dependent inflammatory responses and NFκB activation in BMDMs.** (A, B) WT and 5-LO<sup>-/-</sup> cells were treated with or without LPS or Poly (I:C) for 24 h and RANTES (A) and IL-6 (B) levels were determined by ELISA. (C) WT and 5-LO<sup>-/-</sup> BMDMs were stimulated with or without LPS and Poly (I:C) for 24 h, and nuclear p65 DNA-binding activity was determined as described in Methods. Values represent the mean ± SEM from 3 individual experiments, each performed in triplicate. \**p* < 0.05 versus control WT; #*p* < 0.05 versus LPS-treated WT.

Supplemental Figure 3

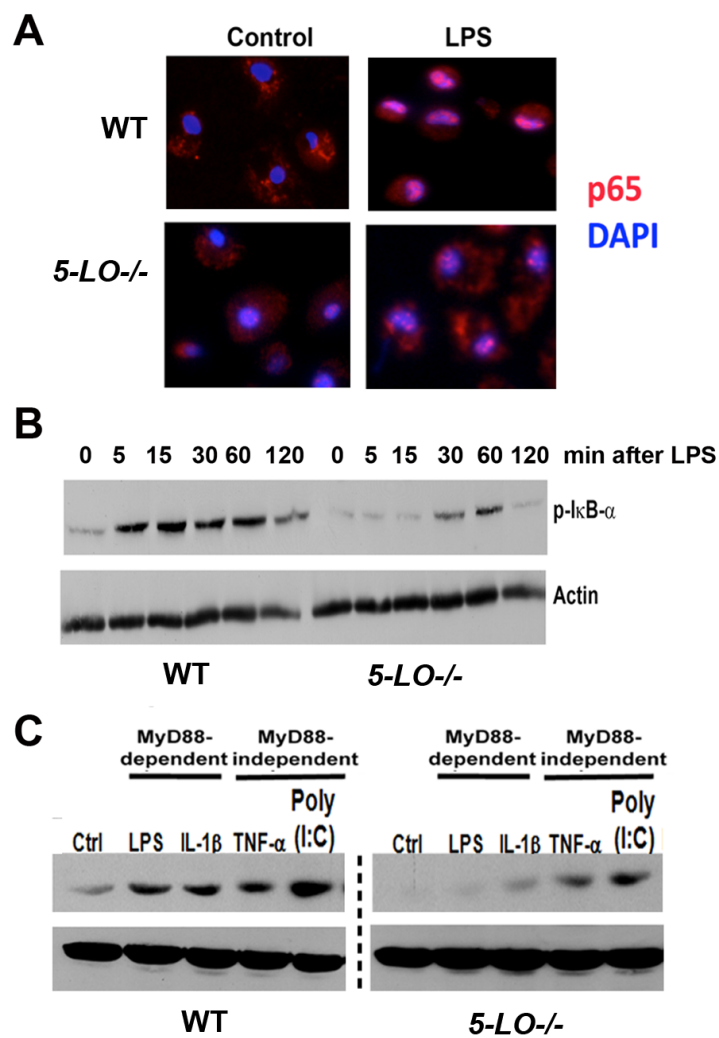

**Supplemental Figure 3. 5-LO metabolism is required for MyD88-dependent NFκB p65 nuclear translocation and IκB phosphorylation. (A)** NFκB p65 localization by immunofluorescence microscopy in WT (top) and 5-LO<sup>-/-</sup> (bottom) MΦs incubated for 24 h with (right) or without (left) LPS. p65 is stained red and DAPI stains nuclei blue; each field depicted is representative of 100 examined, from images captured at 400 x magnification and are representative of those obtained from 3-5 animals per experimental group. (B) Detection of phosphorylated IκB-α by immunoblot in WT and 5-LO<sup>-/-</sup> MΦs incubated for the indicated time points with LPS or (C) for 24 h with MyD88-dependent and -independent agonists. Data are representative of 2-3 independent experiments. In (B), WT and 5-LO<sup>-/-</sup> blots were from the same gel but were noncontiguous; the dashed line indicates missing lanes between the two halves.

Supplemental Figure 4

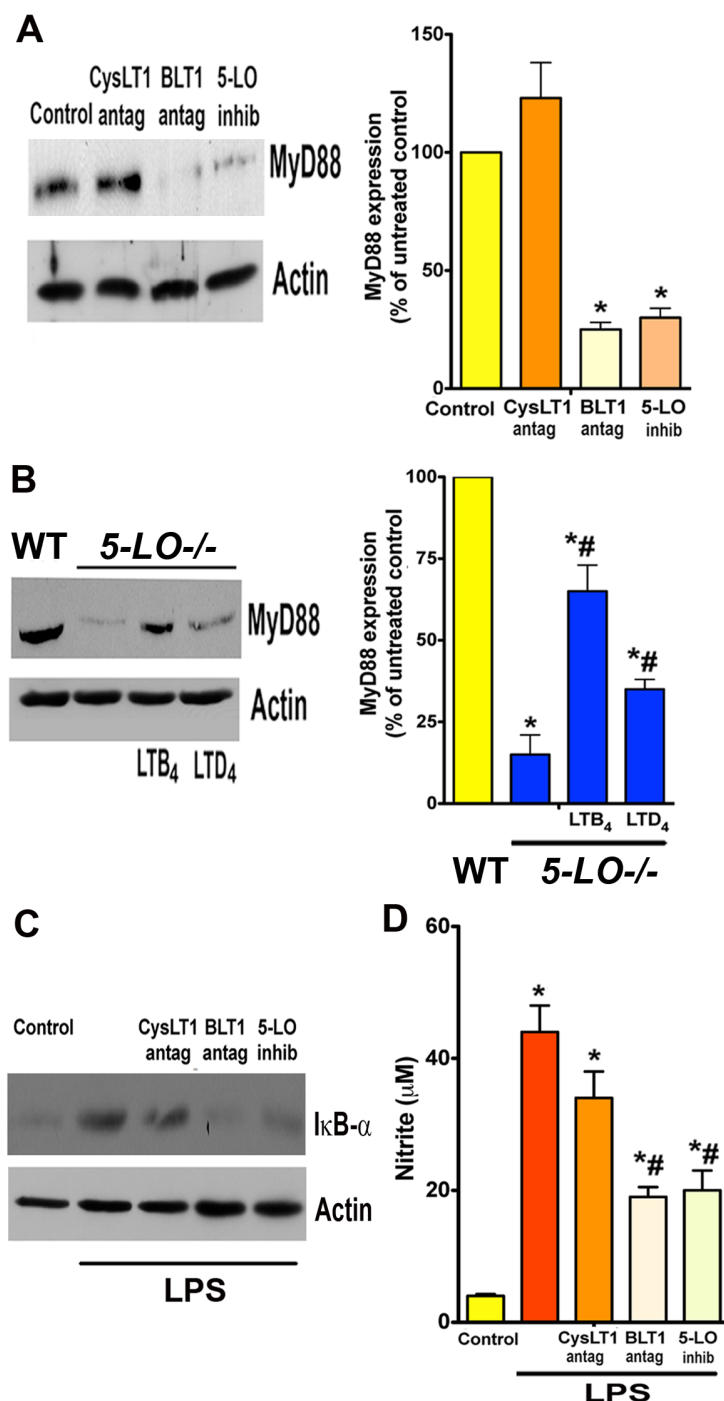

**Supplemental Figure 4. CysLTs are not required for MyD88 expression and LPS-induced IκB-α phosphorylation.** (A and B) MyD88 expression by immunoblot analysis in WT MΦs incubated for 48 h with (A) the 5-LO inhibitor AA-861 (1 μM), the BLT1 antagonist CP105,696 (1 μM) and the CysLT1 antagonist MK571 (1 μM), or (B) LTB<sub>4</sub> and LTD<sub>4</sub>. Data are from one experiment representative of three independent experiments. (A and B, right) Mean ± SEM densitometric values for MyD88 protein in WT MΦs from 3 independent experiments, normalized for actin and expressed relative to the untreated control. \**p* < 0.05 versus WT control; #*p* < 0.05 versus 5-LO-/- control. (C) LPS-induced IκB-α phosphorylation assessed at 1 h in WT MΦs pretreated with the 5-LO inhibitor, the BLT1 antagonist, or the CysLT1 antagonist as described in A for 48 h. (D) Nitrite generation from WT MΦs pretreated as in A and then stimulated with LPS for 24 h. \**p* < 0.05 versus control; #*p* < 0.05 versus LPS-treated cells

Supplemental Figure 5

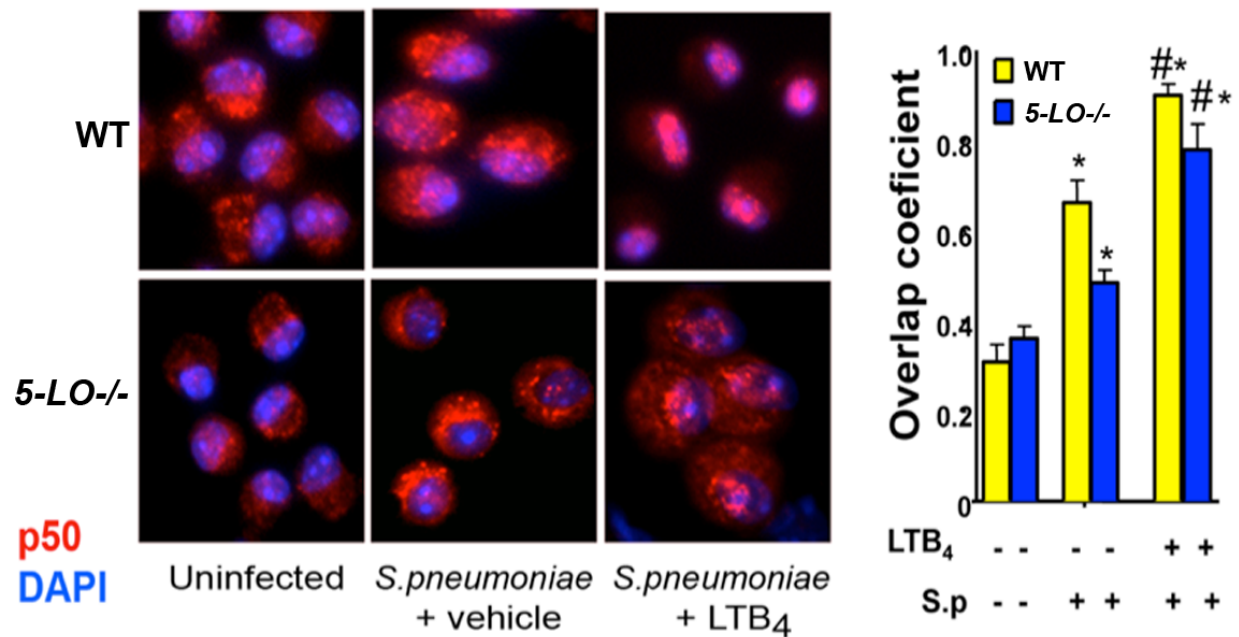

**Supplemental Figure 5. Endogenous and exogenous LTB<sub>4</sub> regulates in vivo NFκB nuclear translocation during *S. pneumoniae* infection.** (left) Ex-vivo NFκB p50 localization in MΦs from lungs of WT and 5-LO<sup>-/-</sup> mice uninfected or infected intranasally with *S. pneumoniae*, treated 24 h thereafter with aerosolized vehicle or LTB<sub>4</sub>, and harvested by lavage 24 later. p50 is stained red and DAPI stains nuclei blue; each field depicted is representative of 100 examined, **from images captured at 400x magnification** and are representative of those obtained from 3-5 animals per experimental group. (right) Quantification of p50/DAPI colocalization was determined as described in the Methods. Data represent the mean ± SEM from 3 individual experiments, with ~100 cells analyzed in each experimental group. \**p* < 0.05 versus control WT; #*p* < 0.05 versus *S. pneumoniae* + vehicle-challenged WT or 5-LO<sup>-/-</sup> mice.

Supplemental Figure 6

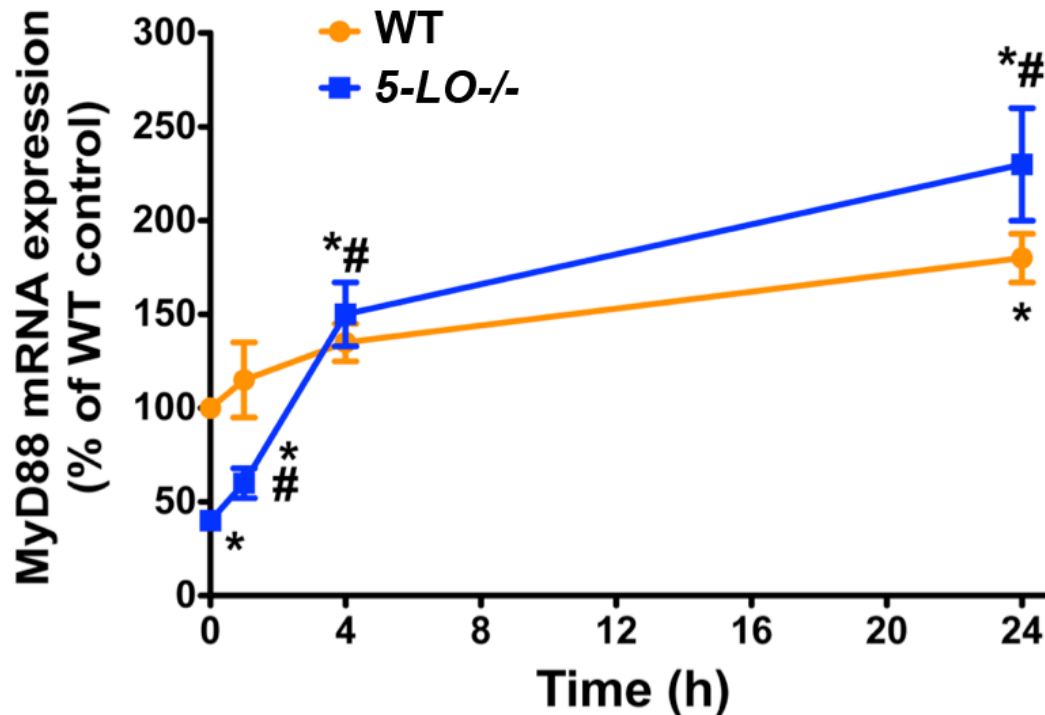

**Supplemental Fig. 6. LTB<sub>4</sub> enhances MyD88 mRNA expression in a time-dependent manner.** WT and 5-LO<sup>-/-</sup> MΦs were incubated for various times with or without LTB<sub>4</sub> and MyD88 mRNA was measured by real time RT-PCR; data represent the mean ± SEM from 3 individual experiments, each performed in triplicate, and values are expressed relative to those in untreated WT MΦs. \**p* < 0.05 versus WT control; #*p* < 0.001 versus 5-LO<sup>-/-</sup> control.

Supplemental Figure 7

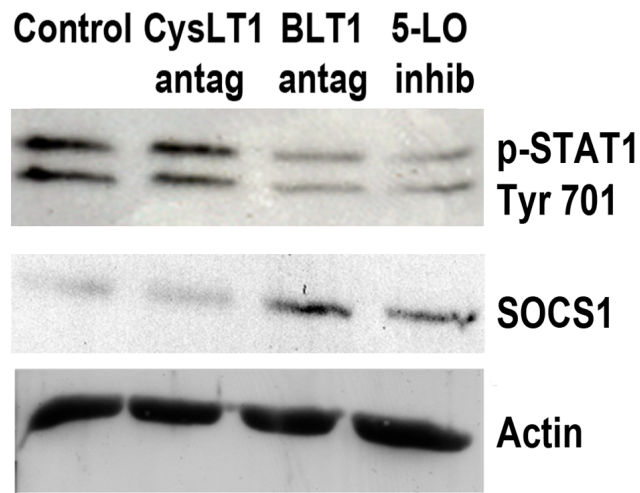

**Supplemental Figure 7. Basal CysLT production is not required for STAT1 phosphorylation and SOCS1 expression.** WT MΦs were treated for 48 h with or without the 5-LO inhibitor AA-861 (1 μM), the BLT1 antagonist CP105,696 (1 μM), or the CysLT1 antagonist MK571 (1 μM) and p-STAT1 (Tyr 701), SOCS1 and actin expression were determined by immunoblotting. Data are representative of two independent experiments.
